# Supplementary material for: FosL1 Is a Novel Target of Levetiracetam for Suppressing the Microglial Inflammatory Reaction
Source: MDPI journal article supplement (doi:10.3390/ijms222010962), 2021-10-11
Supplement: s1 [file s1]

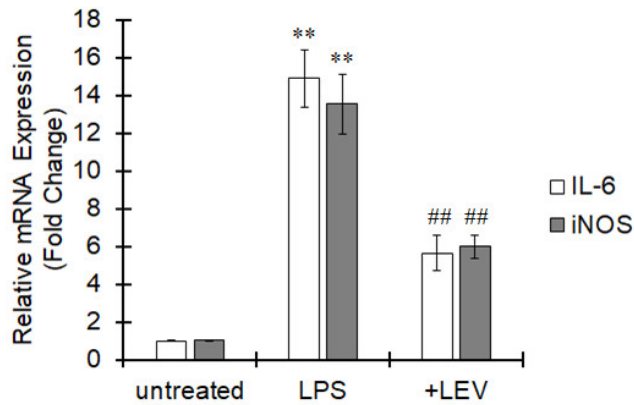

**Figure S1.** Suppression of LPS-induced expression of IL-6 and iNOS by treatment with LEV in BV-2 cells. BV-2 cells were pretreated with 10 mM LEV for 20 min, and subsequently 10 ng/mL LPS was added for 24 h. Total RNA was extracted, and the mRNA expression of IL-6 and iNOS was evaluated by real-time PCR. Primer sequences were listed as Supplementary Table S1. The values are presented as the mean  $\pm$  S.E. of 5 separate experiments. The data were analyzed using ANOVA followed by Student's t-test. \*\*  $p < 0.01$  vs. the untreated group and ##  $p < 0.01$  vs. the LPS-treated group.

**Table S1.** Primers for IL-6 and iNOS detection.

| Target     | Forward Primer         | Reverse Primer       |
|------------|------------------------|----------------------|
| Mouse IL-6 | TCTCTGCAAGAGACTTCCATCC | TTGTGAAGTAGGGAAGGCCG |
| Mouse iNOS | TCCTGGACATTACGACCCCT   | CTCTGAGGGCTGACACAAGG |

**Table S2.** Motifs found in JASPAR database.

| Name      | Sequence                    | Action           |
|-----------|-----------------------------|------------------|
| DREME_001 | AGTCATC                     | Increased by LPS |
| DREME_016 | AAATCACTCAC                 | Increased by LPS |
| AMD_001   | ATGACTGTGAGTGATTTTCTGAG     | Increased by LPS |
| AMD_003   | GTCTGAGGCAGGGGGATGACTG<br>T | Decreased by LEV |
